# Supplementary material
Source: Royal Society of Chemistry journal article supplement (doi:10.1039/d6cp00772d)
Supplement: d6cp00772d2.pdf [file d6cp00772d2.pdf]

## Supplementary Material

for

### Charge Attachment Induced Transport times two - sequential double-CAIT in $\text{Li}_3\text{B}_7\text{O}_{12}$

Victor H. Gunawan, Martin Schäfer, Karl-Michael Weitzel\*

Philipps-Universität Marburg, Chemistry Department; Hans-Meerwein Str. 4,  
35043 Marburg, Germany

Corresponding author: [weitzel@chemie.uni-marburg.de](mailto:weitzel@chemie.uni-marburg.de)

#### Table of Contents

#### 1. Graphical snap shots of the time evolution of concentration depth profiles

#### 1. Graphical snap shots of the time evolution of concentration depth profiles

The Figures S1 to S6 present snap shots of the time evolution of concentration depth profiles shown in Figure 5 of the main text.

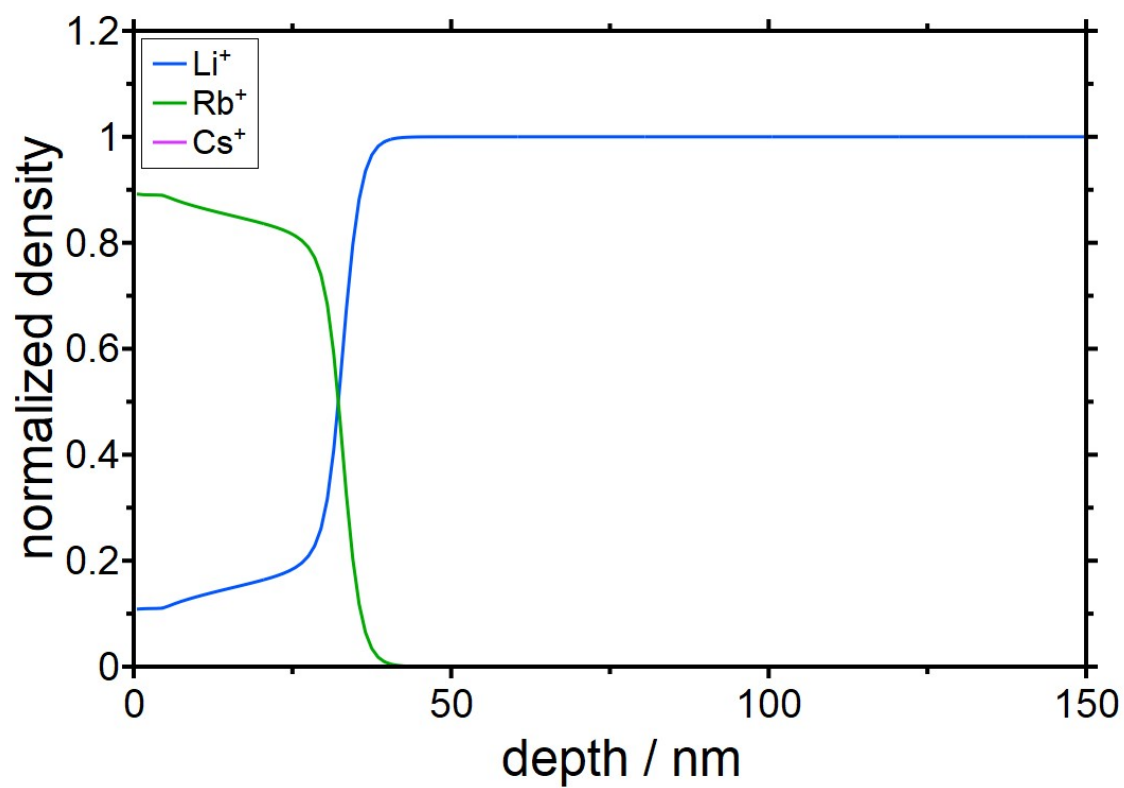

Figure S1 Snap shot of the time evolution leading to Figure 5 (main text) at 60h.

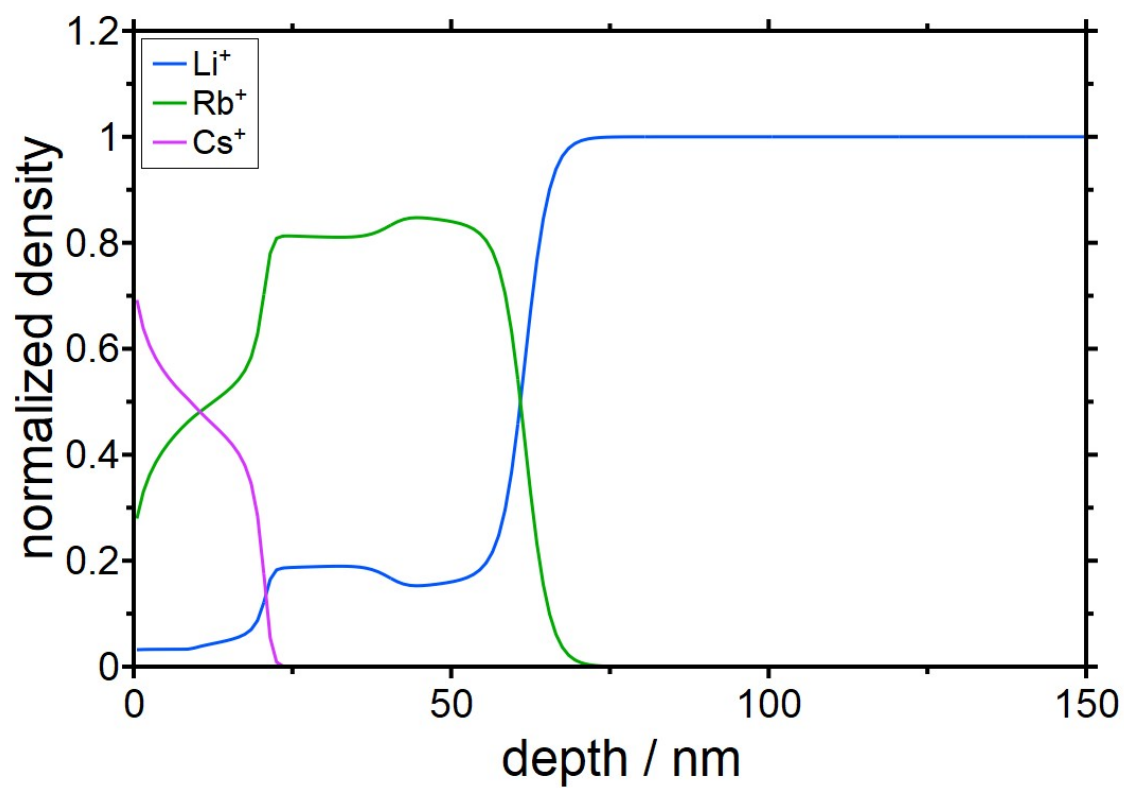

Figure S2 Snap shot of the time evolution leading to Figure 5 (main text) at 120h.

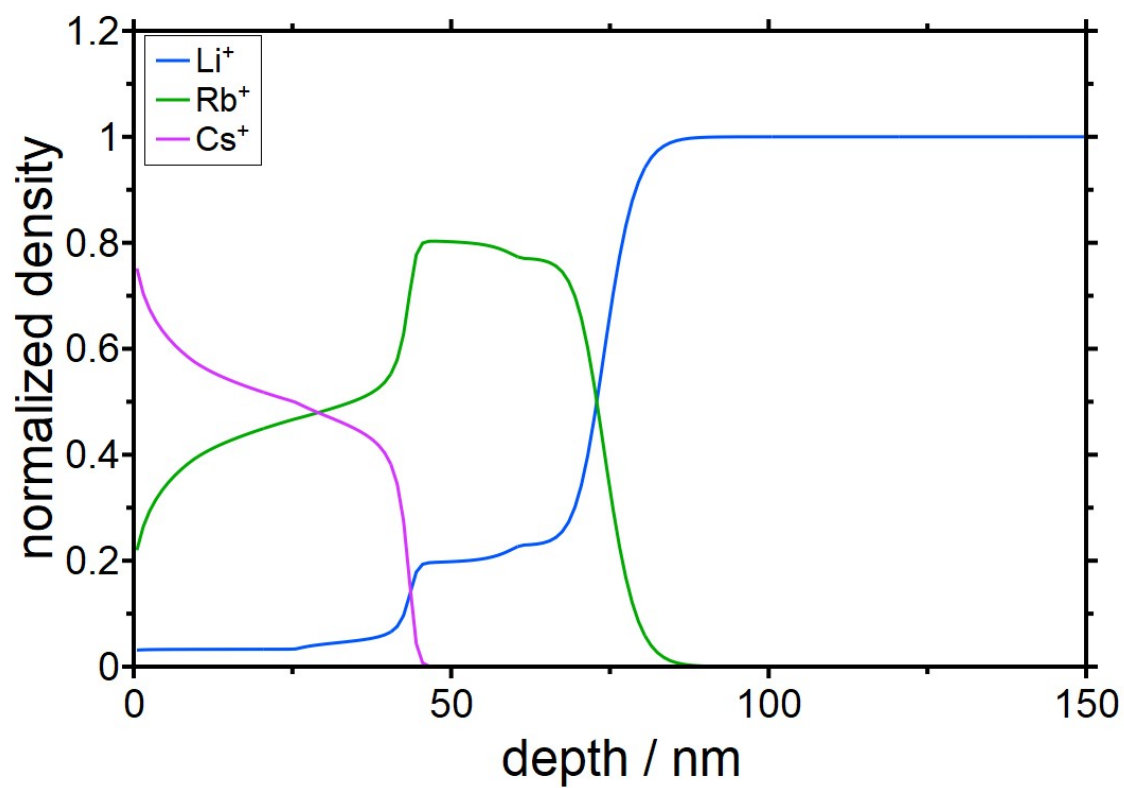

Figure S3 Snap shot of the time evolution leading to Figure 5 (main text) at 160h.

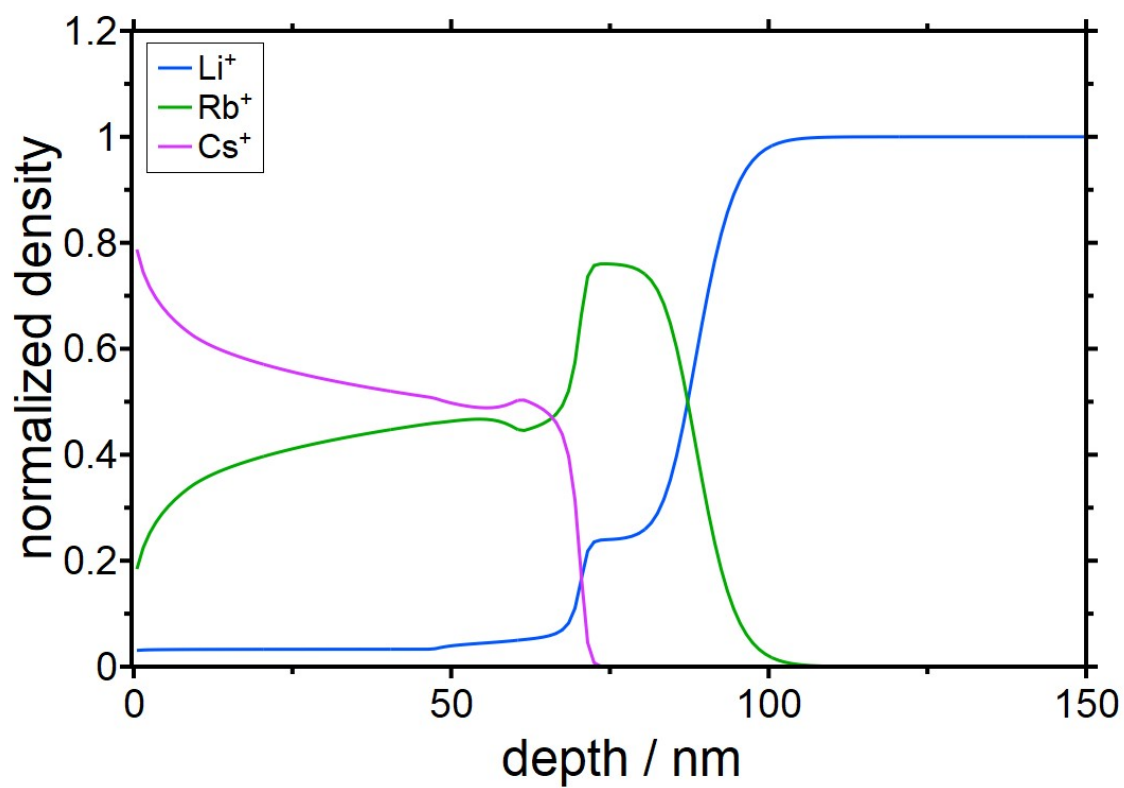

Figure S4 Snap shot of the time evolution leading to Figure 5 (main text) at 220h.

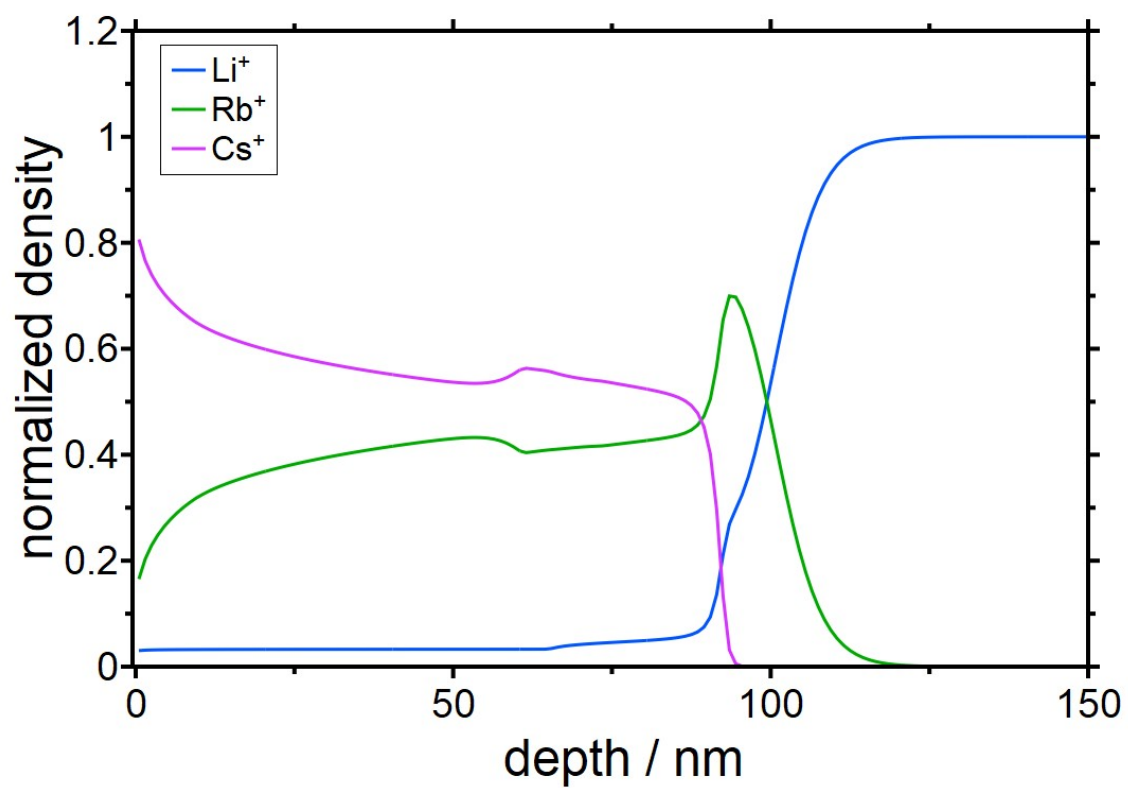

Figure S5 Snap shot of the time evolution leading to Figure 5 (main text) at 280h.
